# Supplementary material
Source: MDPI journal article supplement (https://www.mdpi.com/2311-7524/9/2/270)
Supplement: s1 [file s1]

Archive with 3 entries (3 files):
- Fig.S1.pdf
- Red TE Fig S1.zip
- Suppl Table S1.xlsx
