# Supplementary material
Source: MDPI journal article supplement (https://www.mdpi.com/2311-7524/9/2/270)
Supplement: s1 [file s1 › Suppl Table S1.xlsx]

## Sheet: Table S1 hybrid
Name	MYB10 genotype	a/b ratio
		1	2	3	4	5	average
NY543×Pink Lady-2	RTrt	0.516473	0.748031	0.412189	0.129629	0.571961	0.475656
NY543×Pink Lady-5	RTrt	0.554461	0.918726	0.36695	0.775246	0.761245	0.675326
NY543×Pink Lady-8	RTrt	0.693843	0.786469	0.875039	0.88565	0.731589	0.794518
NY543×Pink Lady-9	RTrt	0.533362	0.776139	0.32379	0.354363	0.454793	0.488489
NY543×Pink Lady-12	RTrt	0.464546	0.587373	0.753799	0.496745	0.494427	0.559378
NY543×Pink Lady-13	RTrt	0.538681	0.243667	0.249113	0.673778	0.467342	0.434516
NY543×Pink Lady-15	RTrt	0.74091	0.675345	0.499557	0.740832	0.810602	0.693449
NY543×Pink Lady-17	RTrt	0.384001	0.636819	0.421304			0.480708
NY543×Pink Lady-18	RTrt	0.768441	0.589149	0.859912	0.751933	0.587507	0.711388
NY543×Pink Lady-23	RTrt	0.457906	0.457921	0.552334	0.598371	0.986957	0.610698
NY543×Pink Lady-28	RTrt	0.106539	0.429373	0.12827	0.244837	0.390046	0.259813
NY543×Pink Lady-29	RTrt	0.398733	0.411027	0.471091	0.16007	0.441914	0.376567
NY543×Pink Lady-30	RTrt	0.176382	0.70939	0.597956	0.208352	0.319007	0.402217
NY543×Pink Lady-33	RTrt	0.616202	0.226409	0.480728	0.786462	0.278749	0.47771
NY543×Pink Lady-36	RTrt	0.499128	0.884913	0.222767	0.896294	0.56774	0.614168
NY543×Pink Lady-38	RTrt	0.264607	0.238345	0.364274	0.299863	0.66909	0.367236
NY543×Pink Lady-39	RTrt	0.379856	0.469083	0.517576	0.275078	0.326259	0.393571
NY543×Pink Lady-40	RTrt	0.723534	-0.0417113	0.446607	0.349956	0.145404	0.324758
NY543×Pink Lady-42	RTrt	0.591554	0.641833	0.351777	0.906073	0.79786	0.657819
NY543×Pink Lady-45	RTrt	0.298007	0.769507	0.587233			0.551582
NY543×Pink Lady-49	RTrt	0.508911	0.698128	0.748873	0.801405	0.877351	0.726934
NY543×Pink Lady-50	RTrt	0.927661	0.782007	0.617733	0.892523	0.411243	0.726234
NY543×Pink Lady-52	RTrt	0.573234	0.225468	0.424923	0.561312	0.358225	0.428632
NY543×Pink Lady-53	RTrt	0.388441	0.0805791	-0.0912555	0.0534163	0.178748	0.121986
NY543×Pink Lady-56	RTrt	0.0371304	-0.158061	-0.0515155	-0.0690534	0.0266995	-0.04296
NY543×Pink Lady-57	RTrt	0.608571	0.407864	0.384554	0.549192	0.529003	0.495837
NY543×Pink Lady-60	RTrt	0.198138	0.775533	0.14629			0.37332
NY543×Pink Lady-64	RTrt	0.798019	0.0604609	0.55992	0.0873943	0.159199	0.332999
NY543×Pink Lady-66	RTrt	0.28495	0.120526	0.0101011	0.0250685	0.11198	0.110525
NY543×Pink Lady-71	RTrt	0.301898	0.446428	0.295841	0.373144	0.383716	0.360206
NY543×Pink Lady-72	RTrt	0.463469	0.3421	0.812739	0.459769	0.796408	0.574897
NY543×Pink Lady-73	RTrt	0.410016	0.478991	0.22345	0.341875	-0.0484276	0.281181
NY543×Pink Lady-76	RTrt	0.808104	0.868729	0.68953	0.703208	0.614307	0.736775
NY543×Pink Lady-78	RTrt	0.310529	0.317627	0.128897	0.622278	0.150805	0.306027
NY543×Pink Lady-84	RTrt	0.688055	0.818668	0.71435	0.447253	0.860426	0.70575
NY543×Pink Lady-85	RTrt	0.862794	0.538501	0.508549	0.367875	0.755211	0.606586
NY543×Pink Lady-86	RTrt	0.926515	0.630203	0.662668	0.48326	0.388403	0.61821
NY543×Pink Lady-88	RTrt	0.130035	-0.0750409	0.124195	0.158293	0.192342	0.105965
NY543×Pink Lady-95	RTrt	0.709201	0.477887	0.727928	0.182806		0.524455
NY543×Pink Lady-96	RTrt	0.763669	0.967188	0.812742	0.703296		0.811724
NY543×Pink Lady-99	RTrt	0.621286	0.860432	0.958298	0.591456	0.785048	0.763304
NY543×Pink Lady-101	RTrt	2.02176	2.08818	1.97326	2.21074	1.21095	1.90098
NY543×Pink Lady-110	RTrt	0.829714	0.368112	0.848254	0.699882	0.41784	0.63276
NY543×Pink Lady-113	RTrt	0.71088	0.502031	0.934023	0.895636	0.797428	0.768
NY543×Pink Lady-115	RTrt	0.693319	0.47428	0.785492	0.49431	0.428242	0.575129
NY543×Pink Lady-117	RTrt	0.656221	0.673061	0.310505	0.763831	0.596872	0.600098
NY543×Pink Lady-119	RTrt	0.813705	0.865091	0.645585	0.807604	0.620874	0.750572
NY543×Pink Lady-120	RTrt	0.641	0.726052	0.508738	0.527222	0.520098	0.584622
NY543×Pink Lady-123	RTrt	0.506034	0.72503	0.905169	0.912789	0.764652	0.762735
NY543×Pink Lady-124	RTrt	0.975321	0.845784	0.521896	1.07213	0.742383	0.831503
NY543×Pink Lady-125	RTrt	0.855281	1.08091	0.876693	0.931492	0.706294	0.890134
NY543×Pink Lady-129	RTrt	0.186623	0.334193	0.45816	0.484608	0.0968744	0.312092
NY543×Pink Lady-132	RTrt	0.215463	0.299348	0.320992	0.326009	0.128157	0.257994
NY543×Pink Lady-133	RTrt	0.351195	0.380755	0.444884	0.682425	0.415193	0.45489
NY543×Pink Lady-138	RTrt	0.389232	0.699477	0.738391	0.465205	0.784681	0.615397
NY543×Pink Lady-139	RTrt	0.850666	0.497984	0.572226	0.531203	0.685112	0.627438
NY543×Pink Lady-140	RTrt	0.50114	0.34131	0.183194	0.231255	0.362228	0.323825
NY543×Pink Lady-142	RTrt	0.468642	0.343564	0.477776	0.523035	0.405186	0.443641
NY543×Pink Lady-144	RTrt	0.607254	0.719803	0.936166	0.892842	0.492361	0.729685
NY543×Pink Lady-149	RTrt	0.729288	0.795858	0.226657	0.329393	0.474462	0.511131
NY543×Pink Lady-151	RTrt	0.351539	0.413128				0.382334
NY543×Pink Lady-154	RTrt	0.835203	0.89301	0.307	0.610302	0.551325	0.639368
NY543×Pink Lady-155	RTrt	0.497755	0.854786	0.77879	0.891395	0.759863	0.756518
NY543×Pink Lady-156	RTrt	0.494695	0.908679	0.203906	0.270082	0.162068	0.407886
NY543×Pink Lady-157	RTrt	0.320846	0.657559	0.488906	0.666657	0.500729	0.526939
NY543×Pink Lady-160	RTrt	0.850068	0.670206	0.733428	0.83011	0.853507	0.787464
NY543×Pink Lady-162	RTrt	0.381131	0.460363	0.271162	0.485276	0.229445	0.365475
NY543×Pink Lady-163	RTrt	0.443163	0.913956	0.735404	0.952446	1.04363	0.817721
NY543×Pink Lady-165	RTrt	0.210746	0.678475	0.291688	0.22312	0.550102	0.390826
NY543×Pink Lady-172	RTrt	0.873418	1.0207	0.575124	1.33405	1.32907	1.02647
NY543×Pink Lady-178	RTrt	0.381339	0.188052	0.594518	0.234004	0.247826	0.329148
NY543×Pink Lady-179	RTrt	0.640498	1.07574	0.827723	1.06562	1.06769	0.935453
NY543×Pink Lady-180	RTrt	0.576709	0.0519338	0.360392	0.6657	0.477663	0.42648
NY543×Pink Lady-181	RTrt	0.846496	0.662917	0.850364	0.94004	0.694302	0.798824
NY543×Pink Lady-184	RTrt	1.16355	0.743111	0.649137	1.30041	1.07521	0.986284
NY543×Pink Lady-185	RTrt	0.274338	-0.109676	0.0930035	0.521528	0.634085	0.282656
NY543×Pink Lady-189	RTrt	0.0774711	0.0880438	0.0602208	0.0852832	0.0967871	0.0815612
NY543×Pink Lady-194	RTrt	1.03968	0.965534	0.612371			0.872527
NY543×Pink Lady-195	RTrt	0.0826885	0.860709	0.428577			0.457325
NY543×Pink Lady-196	RTrt	1.05337	0.896851	0.906782	0.774579	0.795091	0.885334
NY543×Pink Lady-198	RTrt	0.127202	0.192705				0.159953
NY543×Pink Lady-199	RTrt	0.980545	0.789055	0.596584	0.494445	0.797366	0.731599
NY543×Pink Lady-200	RTrt	0.338743	0.218307	0.195365	0.416051	0.402449	0.314183
NY543×Pink Lady-201	RTrt	0.370308	0.787031	0.479213	0.620209	0.374346	0.526221
NY543×Pink Lady-208	RTrt	0.529936	0.649637				0.589786
NY543×Pink Lady-209	RTrt	1.02398	0.830065	1.00189	0.626869	0.538044	0.80417
NY543×Pink Lady-210	RTrt	0.772025	1.19507	0.620635	0.716951	0.940945	0.849125
NY543×Pink Lady-213	RTrt	0.700223	0.483488	0.406889	0.743332	0.559755	0.578737
NY543×Pink Lady-216	RTrt	0.379283	0.273663	1.07685	0.781484	0.862998	0.674856
NY543×Pink Lady-217	RTrt	0.476938	0.726546	0.611123	0.742768	0.262088	0.563892
NY543×Pink Lady-220	RTrt	0.754937	0.682848	0.562412	0.813924	0.460747	0.654974
NY543×Pink Lady-223	RTrt	1.12156	0.897866	1.04814	1.00814	0.9285	1.00084
NY543×Pink Lady-224	RTrt	0.0673379	0.54682	0.453575	0.35652	0.481212	0.381093
NY543×Pink Lady-232	RTrt	0.585847	0.459939	0.894909	1.6691	1.00398	0.922755
NY543×Pink Lady-233	RTrt	0.757199	0.549694	0.494742	0.307437	0.453451	0.512504
NY543×Pink Lady-240	RTrt	0.578799	0.699592	0.643042	0.620112	0.280537	0.564416
NY543×Pink Lady-243	RTrt	0.729323	0.655532	1.00265	0.48506	0.804765	0.735466
NY543×Pink Lady-244	RTrt	0.694938	1.1922	1.45997	1.55277	0.871498	1.15427
NY543×Pink Lady-245	RTrt	0.793709	0.345775	0.859882	0.602017	0.42355	0.604987
NY543×Pink Lady-247	RTrt	0.657652	0.779082	0.809074	1.03617	0.727155	0.801827
NY543×Pink Lady-248	RTrt	0.331911	0.394938	-0.0172716	0.679778	0.299843	0.33784
NY543×Pink Lady-249	RTrt	0.237609	0.287936	0.856025			0.460524
NY543×Pink Lady-257	RTrt	1.12083	1.06366	0.665502	0.832883	0.587696	0.854114
NY543×Pink Lady-258	RTrt	0.645334	0.910598	1.03173	1.03131	0.931911	0.910176
NY543×Pink Lady-259	RTrt	0.305398	0.292738	0.491545	0.606169	0.630739	0.465318
NY543×Pink Lady-263	RTrt	0.979186	1.0827	1.00897	0.963537	0.931032	0.993084
NY543×Pink Lady-265	RTrt	0.481048	0.335945	0.449064	0.896671	1.23326	0.679198
NY543×Pink Lady-267	RTrt	0.833425	0.143788	0.435791	0.251518	0.515593	0.436023
NY543×Pink Lady-272	RTrt	0.496431	0.867643	0.415885	0.323742	0.778314	0.576403
NY543×Pink Lady-274	RTrt	0.723219	0.795325	0.552465	0.822825	0.854105	0.749588
NY543×Pink Lady-275	RTrt	0.797547	0.532388	0.726867	0.531655	0.620228	0.641737
NY543×Pink Lady-278	RTrt	0.834837	0.542674	0.788127	0.732937	0.429023	0.66552
NY543×Pink Lady-282	RTrt	0.42532	0.353616	0.411882	0.215391	0.340896	0.349421
NY543×Pink Lady-285	RTrt	1.05104	0.769443	0.728712	0.847732	0.793143	0.838013
NY543×Pink Lady-286	RTrt	0.629266	0.514214	0.391868			0.511783
NY543×Pink Lady-289	RTrt	0.572658	0.386369	0.312819	0.196464	0.451018	0.383865
NY543×Pink Lady-290	RTrt	0.83009	0.610794	0.918184	0.814303	0.833026	0.801279
NY543×Pink Lady-291	RTrt	0.343605	0.965879	0.58386	0.720856	0.353111	0.593462
NY543×Pink Lady-293	RTrt	1.031	1.06357	0.959031	1.01931	1.16142	1.04687
NY543×Pink Lady-294	RTrt	0.858625	0.6194	1.01652	0.567786		0.765584
NY543×Pink Lady-300	RTrt	0.770901	0.46973	0.758982	0.988823	0.851305	0.767948
NY543×Pink Lady-301	RTrt	0.358981	0.703787	0.548193	0.37862	0.294059	0.456728
NY543×Pink Lady-310	RTrt	0.395501	0.861614	1.0965	0.429772	0.704721	0.697621
NY543×Pink Lady-312	RTrt	0.400919	0.128049	0.173878	0.377293	0.614432	0.338914
NY543×Pink Lady-315	RTrt	0.889289	0.838901	0.685942	0.720696	0.60812	0.74859
NY543×Pink Lady-317	RTrt	0.500236	0.498607	0.37476	0.702008	0.36105	0.487332
NY543×Pink Lady-318	RTrt	0.993315	1.09605	0.661708	0.77923	1.07917	0.921894
NY543×Pink Lady-319	RTrt	0.823436	0.746261	0.57145	0.857641	0.765888	0.752935
NY543×Pink Lady-323	RTrt	0.673228	0.464679	0.818082	0.619545	0.57803	0.630713
NY543×Pink Lady-324	RTrt	0.307241	0.603565	0.313997	0.299139	0.772095	0.459207
NY543×Pink Lady-325	RTrt	0.333999	0.629368	0.630544	0.574476	0.556748	0.545027
NY543×Pink Lady-328	RTrt	0.659874	0.851602	0.764498	0.683171	0.896728	0.771174
NY543×Pink Lady-331	RTrt	1.12679	0.869051	1.06892	0.850254	0.814522	0.945907
NY543×Pink Lady-333	RTrt	0.840235	0.499817	0.887742	0.694698	0.712842	0.727067
NY543×Pink Lady-334	RTrt	0.807522	0.948213	0.854658	0.944039	0.813855	0.873657
NY543×Pink Lady-335	RTrt	1.05295	0.801191	0.896795	1.08178	0.926597	0.951862
NY543×Pink Lady-338	RTrt	0.403336	0.675819	0.741067	0.524627	0.87375	0.64372
NY543×Pink Lady-339	RTrt	0.350198	0.842498	0.879493	0.656898	0.659821	0.677782
NY543×Pink Lady-340	RTrt	0.907932	0.90552	0.84655			0.886667
NY543×Pink Lady-342	RTrt	0.8458	0.674977	0.709933	0.702753	0.925735	0.77184
NY543×Pink Lady-344	RTrt	0.657526	0.589549	0.753661	0.766531	0.678038	0.689061
NY543×Pink Lady-346	RTrt	0.921935	1.06005	0.868494	0.99502	0.927472	0.954594
NY543×Pink Lady-348	RTrt	0.685741	1.03148	0.804288	0.461422	0.508947	0.698375
NY543×Pink Lady-349	RTrt	0.820964	0.916173	0.58487	0.626086	0.85167	0.759953
NY543×Pink Lady-350	RTrt	1.04412	0.526076	0.797507	0.820203	0.632559	0.764093
NY543×Pink Lady-352	RTrt	0.625469	0.614877	0.753211	0.737046	0.865319	0.719184
NY543×Pink Lady-353	RTrt	0.788585	1.03817	0.416551	0.928605	0.680168	0.770416
NY543×Pink Lady-356	RTrt	0.174969	0.197685	0.466693	1.07078	0.344118	0.45085
NY543×Pink Lady-360	RTrt	0.718513	0.49869	0.666364	0.417853	0.559165	0.572117
NY543×Pink Lady-364	RTrt	0.558257	0.661255	0.761212	0.603593	0.868549	0.690573
NY543×Pink Lady-367	RTrt	0.437675	0.222072	0.191714	0.0797946	0.429496	0.27215
NY543×Pink Lady-368	RTrt	0.973263	0.831413	0.563189	0.299995	0.707628	0.675098
NY543×Pink Lady-371	RTrt	0.788778	0.90649	0.77599	0.584575	0.878159	0.786798
NY543×Pink Lady-375	RTrt	0.551169	0.548025	0.647264	0.767841	0.371036	0.577067
NY543×Pink Lady-379	RTrt	0.858678	0.853364	0.619343			0.777128
NY543×Pink Lady-380	RTrt	0.947681	0.791549	0.967675	0.822824	0.488493	0.803644
NY543×Pink Lady-383	RTrt	0.952223	0.608949	0.919642	1.18216	0.96403	0.925402
NY543×Pink Lady-385	RTrt	0.946927	1.02529	0.830934	0.995072	0.595243	0.878694
NY543×Pink Lady-389	RTrt	0.54106	0.949722	0.437234	0.621842	2.07142	0.924255
NY543×Pink Lady-392	RTrt	0.763247					0.763247
NY543×Pink Lady-394	RTrt	0.605052	0.97388	1.58739	1.7128	1.28844	1.23351
NY543×Pink Lady-395	RTrt	0.836864	0.745092	0.994598	0.953869	0.73834	0.853752
NY543×Pink Lady-400	RTrt	0.628586	0.461564	0.765438	0.827493	0.657884	0.668193
NY543×Pink Lady-407	RTrt	0.760631	0.695603	0.998154	0.380818	0.569643	0.68097
NY543×Pink Lady-408	RTrt	0.38549	0.283609	0.354743	0.394446	0.497907	0.383239
NY543×Pink Lady-410	RTrt	0.513884	0.465618	0.676631	0.612697	0.313593	0.516485
NY543×Pink Lady-411	RTrt	0.0877779	0.131919	0.105839			0.108512
NY543×Pink Lady-418	RTrt	0.798668	0.838431	0.47971	0.663183	0.83436	0.72287
NY543×Pink Lady-419	RTrt	0.822751	0.763288	0.752883	0.409532	0.406348	0.63096
NY543×Pink Lady-420	RTrt	0.506151	0.494577	0.666949	0.571848	0.84188	0.616281
NY543×Pink Lady-1	RTRT	0.971252	1.05276	1.40228	0.806888	1.14188	1.07501
NY543×Pink Lady-4	RTRT	2.09709	2.01212	2.05858	1.31748	1.54153	1.80536
NY543×Pink Lady-14	RTRT	0.54027	1.05061	1.01379	1.06122	1.30412	0.994002
NY543×Pink Lady-16	RTRT	0.807551	1.18904	0.976799	0.872138	1.0807	0.985244
NY543×Pink Lady-19	RTRT	1.2747	1.1	0.753271	1.5342	1.1978	1.17199
NY543×Pink Lady-20	RTRT	1.55326	1.74185	2.58109	1.88669	2.04907	1.96239
NY543×Pink Lady-21	RTRT	2.32607	1.93142	2.28823	2.50734	2.127	2.23601
NY543×Pink Lady-22	RTRT	2.64612	1.39254	1.85408	1.49125	1.13969	1.70473
NY543×Pink Lady-27	RTRT	1.78856	1.19303	1.94567	1.39493	0.716208	1.40768
NY543×Pink Lady-31	RTRT	1.26516	1.81453	1.31093	1.10524	1.15672	1.33052
NY543×Pink Lady-34	RTRT	1.00162	1.233				1.11731
NY543×Pink Lady-35	RTRT	0.862094	0.67413	0.994886	0.594622		0.781433
NY543×Pink Lady-41	RTRT	0.730595	0.778693	1.65039	0.246569	0.577833	0.796816
NY543×Pink Lady-46	RTRT	2.0915	1.41755	1.96942	2.20306	1.96549	1.9294
NY543×Pink Lady-47	RTRT	0.86065	0.773819	1.05559	1.10686	1.08361	0.976108
NY543×Pink Lady-48	RTRT	0.642108	0.808678	0.577257	0.565554	0.64264	0.647248
NY543×Pink Lady-51	RTRT	1.13754	0.555002	1.42688	0.589924	0.833458	0.908559
NY543×Pink Lady-55	RTRT	2.73302	2.40499	2.79585	2.35135	2.81122	2.61929
NY543×Pink Lady-58	RTRT	1.79675	1.8565	2.08147	1.84528	1.5516	1.82632
NY543×Pink Lady-59	RTRT	1.83489	1.34646	1.8304	1.71222	1.69735	1.68426
NY543×Pink Lady-61	RTRT	0.872066	0.511741	1.64787	0.730487	0.733963	0.899225
NY543×Pink Lady-62	RTRT	2.25119	1.58675	2.10372	1.92409	1.55303	1.88376
NY543×Pink Lady-63	RTRT	1.39653	1.03816	2.36512	2.31462	2.01629	1.82614
NY543×Pink Lady-65	RTRT	1.43404	1.40528	2.01224	1.89591	2.72922	1.89534
NY543×Pink Lady-67	RTRT	1.33223	1.05676	1.48362	1.2569	1.43438	1.31278
NY543×Pink Lady-74	RTRT	1.97421	1.4181	1.6876	2.28106	1.82557	1.83731
NY543×Pink Lady-75	RTRT	0.345504	1.266	0.609845	1.13707	1.30898	0.933481
NY543×Pink Lady-77	RTRT	2.18261	2.43593	2.87069	2.54788	2.79848	2.56712
NY543×Pink Lady-79	RTRT	2.61855	2.21837	2.28692	2.35168	2.4499	2.38508
NY543×Pink Lady-80	RTRT	2.21986	2.19152	2.51739	1.59476	1.50499	2.00571
NY543×Pink Lady-82	RTRT	1.31914	1.14071	2.64192	1.90188	1.91819	1.78437
NY543×Pink Lady-87	RTRT	1.20921	2.03418	1.32966	1.4299	1.51058	1.50271
NY543×Pink Lady-90	RTRT	1.21511	1.17422	1.87623	1.29787	1.38186	1.38906
NY543×Pink Lady-97	RTRT	1.71012	1.35713	2.53908	2.11982	1.53659	1.85255
NY543×Pink Lady-102	RTRT	1.64932	1.46409	0.871631	1.04679	1.71049	1.34846
NY543×Pink Lady-103	RTRT	1.52111	2.10825	1.18486	1.3724	1.85278	1.60788
NY543×Pink Lady-104	RTRT	0.738905	0.937241	0.24919			0.641779
NY543×Pink Lady-106	RTRT	1.33238	1.53846	1.45972	1.53107	1.44471	1.46127
NY543×Pink Lady-107	RTRT	1.69005	1.72971	1.72473	1.82149	1.99851	1.7929
NY543×Pink Lady-108	RTRT	1.91116	2.1491	2.22801	1.22383	1.1779	1.738
NY543×Pink Lady-109	RTRT	1.80355	1.79427	1.77246	1.68261	1.922	1.79498
NY543×Pink Lady-111	RTRT	1.66805	0.836827	1.13736	2.04348	1.45309	1.42776
NY543×Pink Lady-114	RTRT	2.2292	1.6719	1.58555	1.13413	1.75542	1.67524
NY543×Pink Lady-118	RTRT	1.24475	1.14438	1.46324	1.02333	1.38308	1.25176
NY543×Pink Lady-121	RTRT	0.896108	0.794181	1.01372	0.901217	0.516704	0.824386
NY543×Pink Lady-122	RTRT	1.69663	1.55825	1.44197	1.55001	1.42471	1.53432
NY543×Pink Lady-126	RTRT	1.5374	1.08428	0.889101	1.05241	1.19846	1.15233
NY543×Pink Lady-127	RTRT	1.2341	1.25271	1.27703	0.96796	2.28103	1.40257
NY543×Pink Lady-128	RTRT	1.34751	1.06021	1.10238	1.47563	1.15972	1.22909
NY543×Pink Lady-134	RTRT	1.293	1.62848	1.16736	1.36771	1.55657	1.40262
NY543×Pink Lady-135	RTRT	2.0409	2.16232	2.03097	1.6338	2.28144	2.02989
NY543×Pink Lady-136	RTRT	0.9123	0.583814	1.04388	1.33527	1.09902	0.994857
NY543×Pink Lady-141	RTRT	1.68421	2.61523	1.46754	2.024	1.7635	1.9109
NY543×Pink Lady-143	RTRT	1.70642	0.90568	1.627	1.13572	1.49176	1.37332
NY543×Pink Lady-145	RTRT	1.19275	1.11572	0.919941	0.692507	0.704705	0.925125
NY543×Pink Lady-146	RTRT	2.73761	2.74535	2.65449	2.70544	3.12351	2.79328
NY543×Pink Lady-148	RTRT	0.872936	1.27582	1.3628	1.99468	1.78187	1.45762
NY543×Pink Lady-153	RTRT	1.14142	0.179459	0.466653			0.595845
NY543×Pink Lady-158	RTRT	0.254355	0.800121	0.389538	0.576475	0.944392	0.592976
NY543×Pink Lady-159	RTRT	0.737437	1.10934	0.873987	0.865206	0.881403	0.893475
NY543×Pink Lady-166	RTRT	1.4146	2.07462	1.73841	2.3767	2.56043	2.03295
NY543×Pink Lady-167	RTRT	0.890884	0.81613	0.593028	0.819934	1.16322	0.85664
NY543×Pink Lady-168	RTRT	1.15669	1.92422	2.47062			1.85051
NY543×Pink Lady-169	RTRT	1.33411	1.01705	0.769684	0.820576	0.768538	0.941991
NY543×Pink Lady-171	RTRT	0.735635	0.511024	0.651982	0.794925	1.03677	0.746068
NY543×Pink Lady-173	RTRT	1.27186	0.995226	1.29894	0.672964	1.08276	1.06435
NY543×Pink Lady-174	RTRT	0.77506	0.74935	0.252242	0.877258	0.816536	0.694089
NY543×Pink Lady-175	RTRT	1.98997	1.22799	1.09574	1.69781	1.92971	1.58824
NY543×Pink Lady-182	RTRT	0.636437	0.834109	0.473636	0.433456	0.800649	0.635658
NY543×Pink Lady-183	RTRT	0.714518	0.156155	1.38055	1.15507	1.23723	0.928706
NY543×Pink Lady-188	RTRT	0.200592	0.78751	0.406554	0.349621	0.690977	0.487051
NY543×Pink Lady-190	RTRT	1.11238	0.708772	0.343995	0.954008	0.227069	0.669246
NY543×Pink Lady-191	RTRT	1.30162	1.43445	1.23904	0.808111	1.80675	1.31799
NY543×Pink Lady-192	RTRT	2.18813	1.64704	2.21912	2.13048	2.58414	2.15378
NY543×Pink Lady-197	RTRT	2.09079	1.62868	1.87616	2.63741	2.7289	2.19239
NY543×Pink Lady-202	RTRT	2.50117	2.33956	2.09241	2.01906	1.4991	2.09026
NY543×Pink Lady-203	RTRT	1.58574	1.46845	1.84016	1.80565	1.35316	1.61063
NY543×Pink Lady-205	RTRT	1.31019	0.659417	1.49868	0.184757	0.697189	0.870046
NY543×Pink Lady-206	RTRT	1.93169	1.05939	0.587849	0.549441	0.226447	0.870963
NY543×Pink Lady-207	RTRT	0.555061	0.811493	0.509656	0.767991	0.502326	0.629306
NY543×Pink Lady-212	RTRT	2.87544	2.48643	2.87656	2.47711	2.71254	2.68562
NY543×Pink Lady-218	RTRT	1.66969	2.41103	2.10993	2.50308	2.28141	2.19503
NY543×Pink Lady-219	RTRT	1.65852	2.54263	2.27451	2.37088	2.14857	2.19902
NY543×Pink Lady-221	RTRT	2.08396	2.02599	1.95773	1.44373	2.21005	1.94429
NY543×Pink Lady-222	RTRT	1.07125	0.841214	1.2907	1.33069	1.6594	1.23865
NY543×Pink Lady-225	RTRT	1.5044	1.17685	1.35595	1.21272	1.84806	1.4196
NY543×Pink Lady-226	RTRT	2.05302	1.58005	2.1088	1.89685	2.58166	2.04408
NY543×Pink Lady-227	RTRT	2.1872	2.22881	2.50402	2.406	2.79533	2.42427
NY543×Pink Lady-229	RTRT	2.25684	1.69182	2.14793	1.62013	2.36106	2.01556
NY543×Pink Lady-230	RTRT	2.08551	2.18938	2.13086	2.21213	2.16779	2.15714
NY543×Pink Lady-231	RTRT	2.03279	2.54919	1.86069	1.65553	1.96454	2.01255
NY543×Pink Lady-234	RTRT	1.12049	1.48038	0.956916	0.663256	0.95848	1.0359
NY543×Pink Lady-235	RTRT	2.57541	2.34453	2.24198	2.35514	2.73534	2.45048
NY543×Pink Lady-236	RTRT	0.831171	0.854734	1.00522	0.900542	1.11028	0.94039
NY543×Pink Lady-237	RTRT	1.29098	1.74965	1.54616	1.41236	1.29985	1.4598
NY543×Pink Lady-239	RTRT	0.962259	1.68184	2.05484	0.66181	2.10485	1.49312
NY543×Pink Lady-246	RTRT	1.79225	2.37793	1.74297	1.13951	1.46005	1.70254
NY543×Pink Lady-250	RTRT	1.36704	1.15091	0.969856	1.24387	1.14978	1.17629
NY543×Pink Lady-251	RTRT	1.66903	0.858584	1.16446	1.41061	1.10372	1.24128
NY543×Pink Lady-252	RTRT	1.28871	1.80524	1.47933	1.64802	1.23631	1.49152
NY543×Pink Lady-253	RTRT	1.08593	0.814086	0.554775	0.557224	0.539176	0.710238
NY543×Pink Lady-254	RTRT	0.940609	0.66134	0.712493	0.993055	0.621049	0.785709
NY543×Pink Lady-255	RTRT	1.34263	1.94536	1.49823	1.24871	1.32845	1.47268
NY543×Pink Lady-256	RTRT	2.0956	1.83337	2.16111	1.82131	2.29677	2.04163
NY543×Pink Lady-260	RTRT	2.59273	7.16471	2.79466	2.31009	2.74074	3.52058
NY543×Pink Lady-262	RTRT	1.08706	0.8331	0.870589	1.3461	1.22913	1.07319
NY543×Pink Lady-264	RTRT	1.12466	0.980518	1.26493	0.961478	1.31854	1.13003
NY543×Pink Lady-266	RTRT	3.15158	2.65213	2.68068	2.97417	2.76628	2.84497
NY543×Pink Lady-268	RTRT	2.68345	1.5164	1.32352	2.18093	1.93913	1.92869
NY543×Pink Lady-269	RTRT	1.87625	2.86829	2.82449	2.43338	2.16694	2.43387
NY543×Pink Lady-270	RTRT	0.867338	0.592651	0.70122	0.450957	0.95867	0.714167
NY543×Pink Lady-271	RTRT	0.889633	1.13433	0.691537	1.21731	0.777284	0.942018
NY543×Pink Lady-277	RTRT	0.524459	1.11011	1.22826	0.636209	0.523961	0.804601
NY543×Pink Lady-279	RTRT	1.57624	1.45908	1.34766	1.39266	1.66261	1.48765
NY543×Pink Lady-280	RTRT	1.50213	0.620715	1.85994	1.65656	1.08291	1.34445
NY543×Pink Lady-281	RTRT	1.54982	4.43302	1.28783	1.41693	1.16726	1.97097
NY543×Pink Lady-283	RTRT	1.39594	1.30401	1.49923	1.43247	2.1309	1.55251
NY543×Pink Lady-284	RTRT	1.35445	1.33238	1.74077	2.02388	1.67216	1.62473
NY543×Pink Lady-288	RTRT	1.88685	1.70133	2.33132	1.78023	1.66597	1.87314
NY543×Pink Lady-292	RTRT	1.52264	1.1924	0.86966	1.491	1.26315	1.26777
NY543×Pink Lady-295	RTRT	1.2618	1.33068	1.31905	1.7031	1.1798	1.35889
NY543×Pink Lady-296	RTRT	1.8676	1.80118	1.69822	1.19394	2.22917	1.75802
NY543×Pink Lady-297	RTRT	2.57728	4.08988	1.20997	2.15199	1.8964	2.3851
NY543×Pink Lady-298	RTRT	1.37452	2.0683	1.75216	1.69332	1.08368	1.5944
NY543×Pink Lady-302	RTRT	1.37836	1.86154	1.04461	1.49853	2.31038	1.61868
NY543×Pink Lady-304	RTRT	1.27681	2.12155	1.6098	1.79225	1.85484	1.73105
NY543×Pink Lady-305	RTRT	2.62472	2.70792	2.05804	2.14699	2.26263	2.36006
NY543×Pink Lady-306	RTRT	1.78698	2.41464	2.49367	2.45094	2.4389	2.31703
NY543×Pink Lady-307	RTRT	1.53868	1.61108	1.8585	1.66726	1.7046	1.67603
NY543×Pink Lady-308	RTRT	1.18587	1.19834	1.17997	1.27545	1.13553	1.19503
NY543×Pink Lady-309	RTRT	1.70204	1.50071	2.00896	1.5916	2.09836	1.78033
NY543×Pink Lady-313	RTRT	1.83815	1.06345	0.638848	0.800809	0.587715	0.985796
NY543×Pink Lady-314	RTRT	2.66457	1.75735	1.55993	1.41247	2.00252	1.87937
NY543×Pink Lady-320	RTRT	1.70351	1.57367	1.9631	1.83996	1.52181	1.72041
NY543×Pink Lady-321	RTRT	1.26504	1.42525	1.28725	1.3108	1.29801	1.31727
NY543×Pink Lady-322	RTRT	1.60382	1.71403	1.8451	1.63346	1.85232	1.72975
NY543×Pink Lady-326	RTRT	0.81989	1.22113	1.1795	1.3935	1.84256	1.29131
NY543×Pink Lady-327	RTRT	1.17999	0.975161	1.0842	0.779933	0.631975	0.930251
NY543×Pink Lady-329	RTRT	1.92853	1.9776	1.65346	1.38368	2.13658	1.81597
NY543×Pink Lady-330	RTRT	1.83041	2.2254	2.01487	2.04081	2.35066	2.09243
NY543×Pink Lady-332	RTRT	0.779751	0.914218	1.07192	1.37412	0.54615	0.937231
NY543×Pink Lady-336	RTRT	2.19907	2.36119	2.79153	2.73378	2.63928	2.54497
NY543×Pink Lady-341	RTRT	1.13787	1.5382	1.31275	1.3655	1.34223	1.33931
NY543×Pink Lady-343	RTRT	1.13179					1.13179
NY543×Pink Lady-347	RTRT	0.978528	1.12234				1.05044
NY543×Pink Lady-354	RTRT	1.33597	1.21032	1.26987	1.56909	1.04303	1.28566
NY543×Pink Lady-355	RTRT	2.06736	2.70801	2.20958	1.92763	1.87619	2.15775
NY543×Pink Lady-357	RTRT	2.33223	1.98748	2.30642	2.27196	2.54292	2.2882
NY543×Pink Lady-361	RTRT	2.62555	2.8526	2.46777	2.23637	2.5316	2.54278
NY543×Pink Lady-365	RTRT	1.28049	1.15441	1.15808	1.70881	1.42397	1.34515
NY543×Pink Lady-366	RTRT	2.37064	2.06066	2.53079	2.73878	2.60879	2.46193
NY543×Pink Lady-369	RTRT	2.00828	1.1839	1.94228	1.74747	1.64227	1.70484
NY543×Pink Lady-370	RTRT	1.74611	1.87145	1.54598	1.85694	1.46634	1.69736
NY543×Pink Lady-378	RTRT	1.66975	0.747193	1.27771	0.831008	1.20167	1.14546
NY543×Pink Lady-381	RTRT	2.38659	2.01804	2.6208	2.02388	2.40987	2.29184
NY543×Pink Lady-382	RTRT	1.71248	2.00083	2.02409	1.79167	2.30424	1.96666
NY543×Pink Lady-387	RTRT	1.59003	2.58139	2.01076	1.88925	2.47539	2.10936
NY543×Pink Lady-396	RTRT	1.02381	1.51741	1.08613	1.80095	1.1498	1.31562
NY543×Pink Lady-399	RTRT	1.71987	1.6462	2.37709	1.74651	2.66427	2.03079
NY543×Pink Lady-404	RTRT	0.829368	1.03599	0.22047	0.733007	0.732989	0.710364
NY543×Pink Lady-406	RTRT	1.36152	1.58067	1.74859	1.80015	1.28203	1.55459
NY543×Pink Lady-413	RTRT	0.821664	0.853379	1.18039	0.835163	0.989058	0.935931
NY543×Pink Lady-415	RTRT	0.419376	0.308831	0.415984	1.5922	1.08483	0.764244
NY543×Pink Lady-416	RTRT	2.20169	2.68485	2.50803	2.95535	2.74999	2.61998
NY543×Pink Lady-421	RTRT	2.45491	2.16902	2.39748	2.32644	2.13653	2.29688
NY543×Pink Lady-405	rtrt	-0.160386	-0.125245	-0.15227			-0.145967
NY543×Pink Lady-422	rtrt	0.927721	0.540084	0.74338	0.778896	0.605131	0.719042
NY543	RTRT	2.81109	1.90552	2.86653	2.09778	1.62013	2.26021
Pink Lady	RTrt	0.967997	1.16076	1.03468	1.06023	1.05995	1.05672
